# Supplementary material for: Role and Mechanism of LIF in Oral Squamous Cell Carcinoma Progression
Source: PubMed Central journal article supplement (PMC7073607; doi:10.3390/jcm9020295), 2020-01-21

**Figure S1.** Knocked down LIF expression decreased the invasion and migration capabilities in Cal27 cell lines. (\*\*  $p < 0.01$ ).

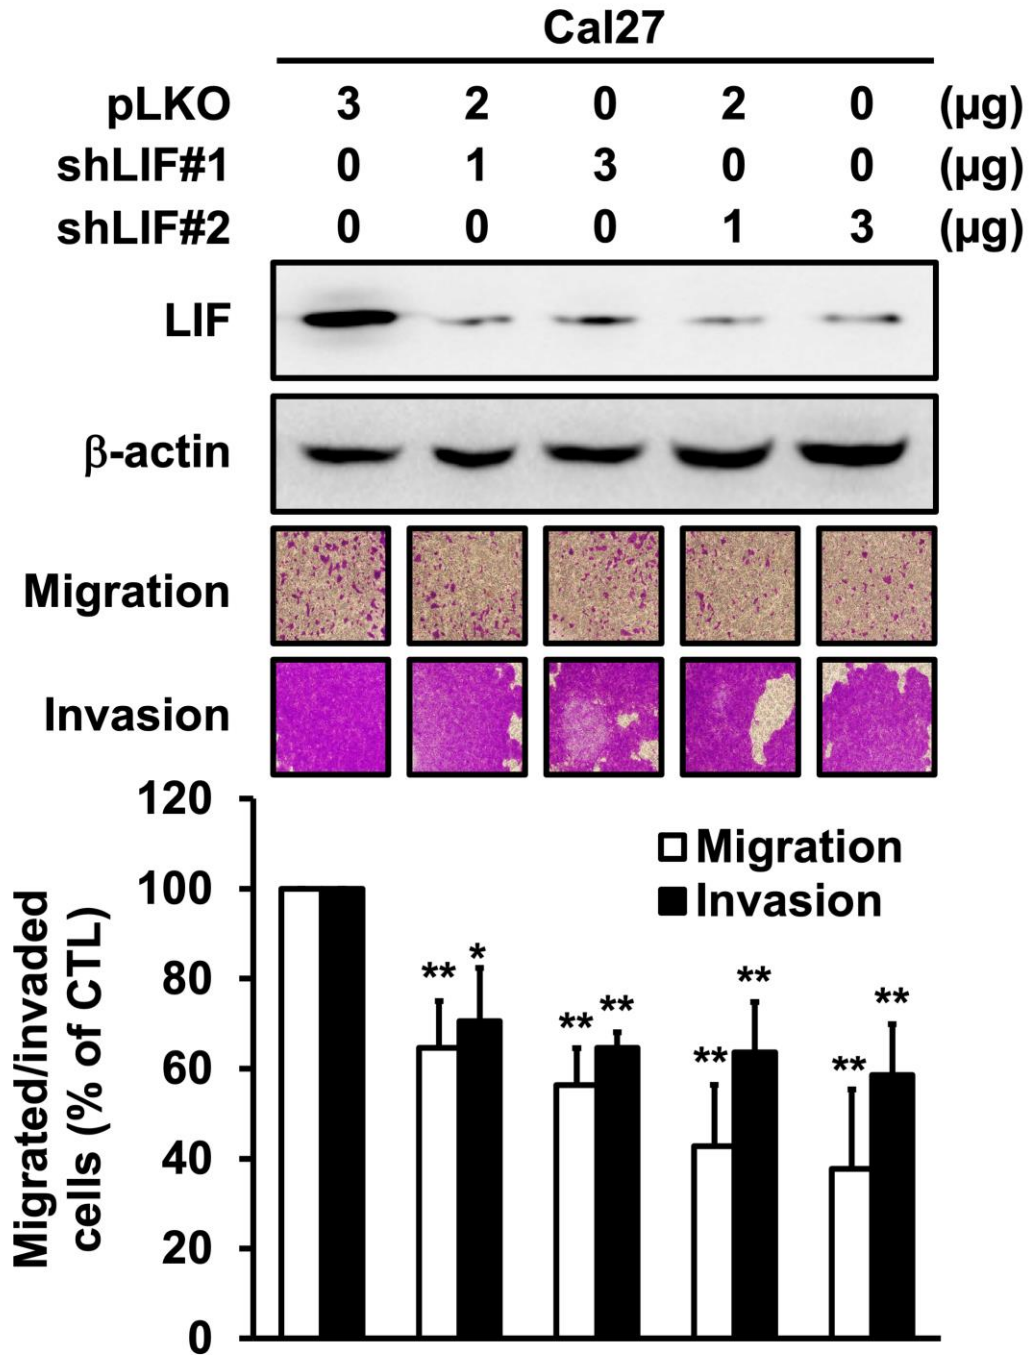

Supplement: jcm-09-00295-s001.pdf [file jcm-09-00295-s001.pdf]
